1 **Genetic variation associated with relative resistance in teak (*Tectona grandis* L. f.)**  
2 **against the leaf skeletonizer, *Eutectona machaeralis* Walker**

3  
4 VIVEK VAISHNAV\*,<sup>1,2</sup> . NITIN KULKARNI<sup>3</sup>. SHAMIM AKHTAR ANSARI<sup>4</sup> . TIKAM SINGH  
5 RANA<sup>2</sup>  
6

7 <sup>1</sup>Molecular Systematic Laboratory,  
8 Plant Diversity, Systematics and Herbarium Division,  
9 CSIR- National Botanical Research Institute, Lucknow, 226001, India

10  
11 <sup>2</sup>Laboratory for Conservation and Genetic Improvement of Forest Trees  
12 Department of Forestry and Environmental Science  
13 Manipur University, Indo-Myanmar Road, Canchipur, Imphal, Manipur, 795003, India  
14

15 <sup>3</sup>Institute of Forest Productivity, Gumla Road, Ranchi, Jharkhand, 482021, India  
16

17 <sup>4</sup>206, Gemini Apartment, Khurram Nagar, Lucknow, 226022, India  
18

19 \*Corresponding author E-mail: vivekvaishnav@live.in  
20

21 **Abstract**

22 **Background:** Photosynthesizing tissue of teak (*Tectona grandis* L. f.) foliage is damaged by a  
23 host-specific insect pest called leaf skeletonizer (*Eutectona machaeralis* Walker) that severely  
24 eclipses annual growth increment and carbon sequestration of natural populations and plantation  
25 of teak. Gene-assisted selection of relatively resistant teak clones may efficiently control the  
26 damage in the populations and plantations. The present investigation aimed to identify genetic  
27 variation associated with relative resistance in teak against the pest.  
28

29 **Method:** The investigation was carried out on 106 teak plus tree clones assembled at the  
30 National Teak Germplasm Bank from the Indian meta-population of teak. Resistance data were  
31 obtained recording the ocular damage caused by the pest to teak accessions for four years.  
32 Genotyping of the teak accessions was performed with 21 co-dominant markers and marker-trait  
33 association mapping was performed confirming the genetic structure of the germplasm bank and  
34 linkage disequilibrium (LD) among the marker loci.

35 **Results:** The sampled teak accessions exhibited a low albeit highly admixed genetic structure  
36 ( $F_{ST}=0.07$ ) and low level of LD (16.66%) among loci, making them suitable for high-resolution  
37 association analysis. A significant correlation ( $p \leq 0.01$ ,  $R^2=0.67$ ) was obtained between intra-  
38 specific heterozygosity and the relative resistance against the pest. A marker locus CCoAMT-1  
39 representing the enzyme *caffeoyl-CoA O-methyltransferase* of phenylpropanoid pathway was  
40 also found significantly ( $p \leq 0.05$ ) associated with the relative resistance against the pest  
41 explaining 6.6% of the phenotypic variation ( $R^2=0.066$ ) through positive effect (0.57) on the trait.  
42

43 **Conclusions:** The present work exhibited a significant correlation of intra-specific  
44 heterozygosity with relative resistance in teak against a pest. It is the first report on teak  
45 identifying genetic markers associated with relative resistance against the pest. The marker can  
46 be applied for the selection of resistant planting stock for breeding and commercial plantation.

47 Further investigation can be performed to understand the expression level polymorphism linked  
48 with the resistance applying next-generation sequencing approaches.

49

## 50 **Keywords**

51 Forest Entomology; Integrated Pest Management; Heterozygosity; Systematic Acquired  
52 Resistance; Expressed Sequence Tags

## 53 **Introduction**

54 Teak (*Tectona grandis* L. f) is a well-known timber species of South-Asian countries. Due to high  
55 commercial demand and ease of cultivation, the species plantations have been widely  
56 established throughout the tropics. It is emerging as a valuable hardwood resource in about 70  
57 countries around the world, attracting large investment from the private sector in Africa, Asia,  
58 and Latin America (FAO 2015). The global annual trade of teak hardwood was about 3% of the  
59 global timber trade (FAO 2015). *Eutectona machaeralis* Walker (Lepidoptera: Pyralidae) is a  
60 major host-specific pest of teak that infests during August to October and specifically develops  
61 towards the end of the growing season before normal leaf shedding (Nair 2001). It is an  
62 oligophagous pest that feeds on mesophyll tissues, leaving only the leaf veins hence called  
63 'skeletonizer'. The skeletonizer has been reported to damage as much as half of the total annual  
64 increment of teak plantations (FAO 2003). Different studies from India have also reported a loss  
65 of 3%-8% in the annual increment of teak plantations (Sangeetha and Arivudainamb 2012) and  
66 damage of 55% of teak seedlings in the forest nurseries (Kulkarni *et al.* 2004) due to the pest  
67 skeletonizer. The control of the teak skeletonizer can therefore lead to substantial economic gain  
68 due to the high value of teak timber, and the large area under commercial plantations. Although  
69 some methods based on silvicultural-cum-biological control (Beeson 1941), and chemical control  
70 (Basu-Chowdhury 1971) have been recommended as the pest control measure, no method as  
71 such is currently employed as a preventive method to control the chances of the pest infestation  
72 (Shukla and Joshi 2001). Biological and chemical methods, to control pest infestation in crops,  
73 need repetition at a specific interval. In the case of forest trees, those methods may be cost-  
74 intensive, and could also affect the environment adversely. Therefore, an integrated pest  
75 management (IPM) approach using resistant planting stock has been suggested to avoid the  
76 chances of pest infestation (Grossi-de-Sá *et al.* 2015; Kulkarni 2017). Now, biotechnological  
77 tools have also been employed for regulating functional genomics through transgenesis for the  
78 development of resistant elite plants and gene silencing for down-regulating the pests for their  
79 control (Zhang *et al.* 2017).

80 Plants exhibit a considerable multitude of natural variations in defense mechanisms  
81 shaped by the different selection pressures (Thompson 2005). The natural variation in plant  
82 traits, like trichome density (Kaplan *et al.* 2009), leaf lamina area, and cuticle thickness (Moles

83 *et al.* 2011) have been found significantly associated with herbivore resistance (Carmona *et al.*  
84 2011). Secondary metabolites are also known to play a significant role in defense against  
85 herbivores with the pleiotropic effect of genes associated with them (Carmona *et al.* 2011). The  
86 selection of genetically improved genotypes utilizes the natural genetic variation of the plants for  
87 the trait. However, very little of the natural variation of forest trees could be exploited for their  
88 genetic improvement. The wide array of genetic heterogeneity can be explored to screen out the  
89 natural resistant genotypes and variety (Broekgaarden *et al.* 2011) with help of biotechnological  
90 interventions.

91 Association studies, based on the DNA marker system, helps to develop the gene-  
92 specific markers associated with specific resistance to facilitate marker-assisted selection (MAS)  
93 and breeding (Butcher and Southerton 2007). Numerous molecular markers developed in many  
94 tree species have enabled the genetic dissection of important quantitative characters using an  
95 association mapping approach. Efforts have been made to screen out the DNA markers linked  
96 with genes responsible for the resistance against pests in some model plant species  
97 (Broekgaarden *et al.* 2011; Sandhu and Kang 2017). Mapping wheat genome through  
98 microsatellite markers, two QTLs from 12-oxo-phytodienoic acid reductase (OPR) and  
99 lipoxygenase (LOX) genes was reported significantly associated with resistance to Hessian fly  
100 (*Mayetiola destructor*) in wheat (Tan *et al.* 2013). Through the QTL mapping approach, single  
101 nucleotide polymorphism (SNP) linked with QTL governing the resistance to sunn pests  
102 (*Eurygaster integriceps* Puton) was identified in wheat (Emebiri *et al.* 2017). In rice also, SNPs  
103 associated with resistance against brown planthopper (*Nilaparvata lugens* Stål) were reported  
104 (Kusumawati *et al.* 2018). These approaches have not been applied to non-model forest tree  
105 species due to a lack of background genomic information and the molecular level physiological  
106 mechanism regulating the resistance. There are only a few investigations reported for disease  
107 resistance (Quesada *et al.* 2010) and pest resistance (Zhang *et al.* 2018) in forest trees. Since  
108 teak is highly sought-after timber in the global market, we applied the association mapping  
109 approach to identify naturally introgressive genomic loci associated with the relative resistance  
110 in teak against the skeletonizer *E. machaeralis*.

## 111 **Methods**

### 112 **Assessment of *E. machaeralis* infestation**

113 National Teak Germplasm Bank (NTGB), situated at Chandrapur, Maharashtra, India (*N*  
114 *19.976240 E 079.338117*), had been established planting triplicate ramets of plus trees  
115 (phenotypically superior trees) selected in natural forests, distributed over 12 states in India  
116 (Kumar *et al.* 1998). The relative resistance data against the infestation of *E. machaeralis* was

117 observed on three ramets of 106 teak plus tree clones representing 10 states (Roychoudhury  
118 and Joshi 1996). The continuous variation in relative resistance among the genotypes against  
119 the pest infestation was recorded based on ocular observation of defoliation in categories of 0%,  
120  $\leq 25\%$ ,  $\leq 50\%$ ,  $\leq 75\%$ , and  $\leq 100\%$ , respectively for every year in each ramet (Additional Table 1).  
121 For investigation, these categories were assessed through five rating criteria, viz., 0, 1, 2, 3, and  
122 4 respectively (Additional Table 1). An average rating of four years of observation for each ramet  
123 was obtained in nine different classes (Roychoudhury and Joshi 1996) covering the most  
124 susceptible (3.0) to the most resistant (1.0) that was further employed for the genetic analysis  
125 (Table 1).

### 126 **Plant materials for DNA isolation**

127 The branch cuttings collected from each of 106 teak tree clones were sampled from the NTGB.  
128 The sampled cuttings were treated with IAA (5 mM) at the bottom end and sealed at the top end  
129 with the paraffin wax, and then planted in the nursery of Genetics and Plant Propagation Division,  
130 Tropical Forest Research Institute, Jabalpur. The newly sprouted juvenile leaves from those  
131 cuttings were harvested and stored in a cryo-freezer (-80 °C) for genomic DNA isolation.

### 132 **DNA isolation and marker assay**

133 The DNA was extracted from the leaf samples following a modified CTAB method (Narayanan  
134 *et al.* 2006). A set of 21 DNA markers including 13 nuclear simple sequence repeats (nuSSRs)  
135 primers and 8 expressed sequence tag (EST) based markers (Vaishnav and Ansari 2018) were  
136 employed for the investigation. The EST-based markers included a Catalase gene-based primer  
137 characterized in teak (Cheua-ngam and Volkaert 2006). To employ candidate gene-based  
138 approach in association analysis, 15 primers were designed from the genes representing three  
139 enzymes of the phenylpropanoid pathway in plants viz. *phenylalanine ammonia-lyase* (PAL),  
140 *cinnamoyl-CoA reductase* (CCR), and *caffeoyl-CoA O-methyltransferase* (CCoAMT), following  
141 the primer designing criteria and procedure as described by Vaishnav and Ansari (2018). Out of  
142 these 15 primers, only 7 primers could be characterized on the sampled teak genotypes (Table  
143 2). Finally, 21 sets of primers were selected for the final amplification (Additional file, Table 2).  
144 The PCR amplification was performed following the protocol as described by Vaishnav and  
145 Ansari (2018). A data profile was generated from the electrophoresis gel images. The samples  
146 with missing alleles (<5%) were omitted and finally, a genetic profile of 21 co-dominant markers  
147 on 106 teak genotypes along with their corresponding relative resistance data was developed  
148 for analysis.

### 149 **The genetic information of the markers**

150 Major allele frequency (*MAF*), expected heterozygosity or gene diversity ( $H_e$ ), observed  
151 heterozygosity ( $H_o$ ), and the polymorphic information content (*PIC*) were calculated for each  
152 marker using POWERMARKER v3.25 (Liu and Muse 2005). To identify the loci with a signature  
153 of environmental adaptation, a highly robust program BAYESCAN v2.1 (Foll and Gaggiotti 2008)  
154 was applied to detect the loci under selection. The q value threshold, i. e.  $\leq 0.1$  was used to  
155 discriminate false positive among the detected loci employing reversible jump MCMC (burn-in  
156 50 000 iterations, a thinning interval 20, and a sample size of 5000) and estimation of the  
157 Bayesian posterior probability in form of logarithm value of the posterior odds ( $\text{Log}_{10}$  (PO)).

## 158 **Genetic structure and linkage disequilibrium (LD)**

159 Genetic diversity and structure were estimated to confirm true representation of the natural  
160 variation in the teak genetic resource of the country by the germplasm bank, and to avoid the  
161 chances of spurious and false-discovery of association due to a structured sample. A Bayesian  
162 analysis of genetic structure was performed using STRUCTURE v2.3.4 (Pritchard *et al.* 2000;  
163 Falush *et al.* 2007; Hubisz *et al.* 2009). The analysis uses multi-locus genotypes to infer the  
164 fraction of an accession's genetic ancestry that belonged to a population, for a given number of  
165 populations (K). The posterior probabilities were estimated for each value of K between 1 and  
166 10 with MCMC simulation. The results were based on 500,000 iterations of this chain, following  
167 a burn-in period of 1000,000 iterations. The MCMC chain was run multiple times, using  
168 LOCPRIOR with admixture and correlated allele frequency model (prior mean is 0.01, prior SD  
169 0.05, and lambda set at 1.0 in the advanced option of the program). For every number of K three  
170 simultaneous runs were performed. To infer the true number of K, the  $\Delta K$  method developed by  
171 Evanno *et al.* (2005) was implemented with the help of online software STRUCTURE  
172 HARVESTER (Earl and VonHoldt 2012). Following the most appropriate number of K assigned  
173 for the samples resulted in the software, the corresponding inferred ancestry coefficient (Q) for  
174 each genotype was obtained. A model-free approach was also applied to discriminate the  
175 genetic structure of investigated teak accessions and principal coordinate analysis (PCoA) was  
176 performed through program GENALEX v6.0 (Peakall and Smouse 2012). An analysis of  
177 molecular variance (AMOVA) was performed in ARLEQUIN v3.5 (Excoffier and Lischer 2010) to  
178 obtain the variation in genetic differentiation among representative population accessions and  
179 their  $F_{ST}$  was also calculated. The level of LD among loci was estimated using the pair-wise  
180 recombination coefficient ( $R^2$  values) calculated by TASSEL v2.1 (Bradbury *et al.* 2007). The  
181 percentage of the marker combinations was calculated by estimating the number of marker  
182 combinations with significant LD ( $p \leq 0.05$ ) on the total number of marker combinations at a  
183 different level of  $R^2$  values  $> 0.1$ .

## 184 **Genetic heterogeneity of relative resistance**

185 Genetic heterogeneity of teak genotypes among nine classes covering relatively the most  
186 susceptible (3.0) to the most resistant (1.0) against the skeletonizer was estimated by measuring  
187 the percentage of polymorphism (%  $P$ ), and  $H_o$  applying program POPGENE v1.31 (Yeh *et al.*  
188 1999).

## 189 **Marker-resistance association and verification**

190 The marker-trait association analysis was performed applying both general and mixed linear  
191 models (GLM and MLM) utilizing the algorithm efficient mixed-model association or EMMA (Kang  
192 *et al.* 2008) through TASSEL v2.1 (Bradbury *et al.* 2007), as suggested by Yu *et al.* (2006)  
193 incorporating a kinship matrix ( $K$ ; calculated through TASSEL) and the ancestry coefficient ( $Q$ ;  
194 obtained from STRUCTURE) to control false-discovery rate (FDR). Advanced over GLM, the  
195 MLM considers the markers applied to the study as a fixed-effect factor, and the population  
196 structure information of the sampled genotypes are considered as random effect factors avoiding  
197 possible spurious association. The significant marker-trait association was determined based on  
198 marker adjacent  $p$ -value ( $p \leq 0.05$ ). Bonferroni correction was applied ( $\alpha = 0.05$ ) to screen out the  
199 false-discovery of association. The  $R^2$  value indicated the percentage of phenotypic variance  
200 explained by the identified marker associated with the trait. The phenotypic effect of the allele  
201 was also determined and the mean of positive or negative allele effects was calculated as the  
202 average (positive or negative) allelic effect of a marker/locus.

## 203 **Results**

### 204 **The genetic information of the markers**

205 The analysis of the genetic profile of teak plus tree clones on 21 co-dominant markers resulted  
206 in a major allele frequency of  $0.67 \pm 0.11$  ranging from 0.52 to 0.90 by the markers. The  $H_e$  was  
207  $0.41 \pm 0.09$  ranging from 0.18 to 0.50, whereas  $H_o$  was  $0.21 \pm 0.20$  that varied from 0 to 0.75. The  
208  $PIC$  value was  $0.32 \pm 0.05$ , which ranged from 0.16 to 0.37 (Additional Table 2). The  $F_{ST}$  values  
209 of the markers ranged from 0.11 to 0.19 and no locus was found as an outlier under selection  
210 due to insignificant ( $< 0.5$ ) posterior odd (Figure 1).

### 211 **Genetic structure and linkage disequilibrium**

212 Teak plus tree clones sampled for the investigation exhibited  $65.24 \pm 34.70\%$  of polymorphism,  
213 and  $0.29 \pm 0.15$  of  $H_e$ , and  $0.27 \pm 0.14$  of observed heterozygosity, respectively (Additional Table  
214 3). The Bayesian estimation-based genetic structure assessment of the germplasm bank

215 resulted in very low genetic structure ( $\Delta K < 250$ ) with low support to  $K=2$  as the most suitable  
216 number of cryptic populations for the sampled teak genotypes (Additional file, Figure 1). The  
217 PCoA also resulted in one admixed group of six locations of teak from the north, central and  
218 south India and the other four locations of the east (ARP), west (GJ), central (MP), and south  
219 (KR) India remained distinctly (Additional Figure 2). The hierarchical variation was 7.48% among  
220 the representative populations and 92.51% within the population with an  $F_{ST}$  value of 0.07.  
221 Among the 210 pairs of loci, 16.66% were found in significant LD ( $p \leq 0.05$ ,  $R^2$  values  $> 0.1$ ).

## 222 Genetic heterogeneity of relative resistance

223 The polymorphism in different classes of the relative resistance of the representative teak trees  
224 ranged from 47.62% to 100% while  $H_o$  varied from 0.09 to 0.47 (Table 1). A highly significant  
225 ( $p \leq 0.01$ ) and positive correlation was found between relative resistance class and intra-specific  
226  $H_o$  (Figure 2).

## 227 Genomic loci associated with the relative resistance

228 Among all markers, only the CCoAMT-1 was found significantly ( $p \leq 0.05$ ) associated with the  
229 relative resistance to the skeletonizer in teak explaining 6.6% of the phenotypic variation ( $R^2 =$   
230 0.066) through positive effect (0.57) on the trait.

## 231 Discussion

232 Teak is an entomophilous tree species with a high crossing rate (Shrestha *et al.* 2005), hence  
233 insects play a major role in pollination (gene flow) in teak meta-population maintaining a greater  
234 variation among the genotypes within the population (Verhaegan *et al.* 2010; Vaishnav *et al.*  
235 2015; Vaishnav and Ansari 2018). Application of chemical pesticides against the pests may  
236 result in the mortality of the useful insects helping its pollination success and genetic diversity. A  
237 very high intra-specific genetic diversity exhibited by teak populations needs high selection  
238 intensity for increased genetic gain for quantitative traits such as relative resistance against the  
239 pest. Therefore, there is a wide scope for the DNA-based marker-assisted selection of resistant  
240 teak genotypes. But lack of investigation on genetic causal factors governing the resistance  
241 against pests like teak skeletonizer has led to a gap in molecular level information to apply the  
242 marker-assisted selection of resistant planting material.

243 The advancement of gene sequencing technology and available genic sequences in  
244 genome database (e. g. National Center for Biotechnology Information) has improved the  
245 robustness and resolution of marker-trait association analysis. Therefore, we preferred a  
246 candidate gene-based approach of association mapping and applied few co-dominant markers

247 from the gene sequences representing enzymes of the phenylpropanoid pathway, discovered in  
248 model plant species. The phenylpropanoid pathway producing the lignin and other secondary  
249 metabolites are known to have a major role to express the resistance in different plant species  
250 to various pests and pathogens (Raiskila 2008; Santiago *et al.* 2013). Enzymes of this pathway  
251 were found regulating the synthesis of secondary metabolites providing structural support to the  
252 plant wood and inducing the systematic acquired resistance (SAR) against pests and pathogens  
253 (Sticher *et al.* 1997; Fraser and Chapple 2011). *Phenylalanine ammonia-lyase* (PAL), the  
254 regulating enzyme of the phenylpropanoid pathway, converts phenylalanine into cinnamate. It  
255 has been found associated with resistance in plants (Dixon *et al.* 2002; Ning and Wang 2018).  
256 *Cinnamoyl-CoA reductase* (CCR), which converts p-coumaroyl Co-A into p-coumaraldehyde, is  
257 found to have a role in defense signaling in plants (Kawasaki *et al.* 2006). *Caffeoyl-CoA O-*  
258 *methyltransferase* (CCoAMT) converts Caffeoyl Co-A into Feruloyl Co-A and has been known to  
259 trigger disease resistance response in plants (Schmitt *et al.* 1991). Since these enzymes have  
260 been discovered to play role in the regulation of pest resistance in plants, we preferred them to  
261 design primers for our investigation.

262 The collection of NTGB was investigated as a training population for association analysis,  
263 as it is the only collection of the teak accessions in India that represents major provenances of  
264 teak metapopulation in form of a clonal orchard and suitable to perform a common garden test.  
265 Further, the germplasm bank collection is advantageous over natural population for marker-trait  
266 association studies, as in contrary to the samples from a germplasm bank collection, the  
267 phenotypic variation in the samples from a different natural population are critically influenced  
268 by the environment (Ingvarsson and Street 2011).

## 269 **The genetic information of the markers**

270 The SSRs and ESTs have been successfully applied for the association mapping in many out-  
271 crossing plant species to identify the genomic loci linked to several traits of interest (Motilal *et al.*  
272 2016; Zhang *et al.* 2016; Zhang *et al.* 2018, Vaishnav and Ansari 2018). For the present  
273 investigation, we applied 13 SSR markers and 8 EST-SSR markers specifically designed and  
274 characterized on teak. The genetic informativeness of these markers has been confirmed for  
275 high-resolution association analysis. The genetic parameters depicting the genetic information  
276 did not differ markedly among the markers (Additional Table 2). The major allele frequency  
277 ( $0.67 \pm 0.11$ ) infers the evolutionary demographic history of a species genome (Kim *et al.* 2011)  
278 hence the value confirms the wide genome coverage of the markers for association mapping.  
279 The difference between the  $H_e$  and the  $H_o$  of the markers confirmed their deviation from Hardy-  
280 Weinberg Equilibrium (HWE) and two markers (Ver12 and Ver13) revealed slightly higher values



281 of  $H_o$  than  $H_e$ . Possibly, these two markers belong to the genomic region of the species that could  
282 be swiped in due to selected teak plus trees for the germplasm bank. In general, artificial  
283 selection based on superior traits leads to the heterozygote advantage (Hedrick, 2015). In the  
284 present study, the markers found with lower  $H_o$  than  $H_e$  confirmed the scope for a further  
285 selection of superior clones among the assembled accessions. Due to the specificity, the PIC  
286 values of the markers were found lower than those reported in other plant species (Kesari *et al.*  
287 2010). No locus was found potentially affected by the divergent selection (Figure 1) avoiding  
288 historical demographic influence on genetic structure and differentiation of the germplasm (e.g.  
289 Mandel *et al.* 2013) hence could be reliable to apply for the marker-trait association analysis.

### 290 **Genetic structure and linkage disequilibrium**

291 The teak population of India harbors the greatest genetic variability, revealing 80.30% to 80.55%  
292 of polymorphism and 0.64 to 0.76 of  $H_e$  (Fofana *et al.* 2008). However, the sampled genotypes  
293 with low values for polymorphism and  $H_e$  indicates the signature of genetic drift conceivably due  
294 to assemblage of only selected superior clones in the teak germplasm bank. The Bayesian-  
295 algorithm based analysis has revealed a very weak ( $\Delta K < 250$ ) genetic structure of two cryptic  
296 populations (i.e.  $K=2$ ), vis-a-vis high admixing among sampled genotypes. The PCoA has also  
297 presented similar results, where the source locations (states) of the teak genotypes have been  
298 found in the admixed group and have not presented a clear structure among them. Low  $F_{ST}$   
299 (0.07) value confirms a high gene flow among sub-populations on an evolutionary time frame  
300 that has led to highly admixed Indian teak meta-population since the distant past. Due to short-  
301 distance cross-pollination through insects in teak (Shrestha *et al.* 2005), AMOVA has resulted in  
302 a higher genetic variation among the genotypes (92.51%) and avoids inbreeding depression in  
303 the population. Consequently, the observed significantly low LD (16.66%) among loci-pairs in  
304 the present investigation is feasible as allogamy attracts faster LD decay than autogamy. Hence  
305 it confirmed the suitability of the germplasm bank assemblage as a training population to exploit  
306 the historical recombination events for a fine resolution marker-trait association mapping (Myles  
307 *et al.* 2009). On the other hand, it suggests validating the association in a testing population to  
308 avoid the probability of false discovery.

### 309 **Genetic heterogeneity of relative resistance**

310 A significant linear correlation between the relative resistance classes representing the most  
311 resistant (1.0) to the most susceptible (3.0) teak genotypes with observed heterozygosity (Figure  
312 2) establishes that the intra-specific heterozygosity in the teak population may lead to the greater  
313 resistance against teak skeletonizer infestation. Although heterozygosity has been considered

314 to contribute to population fitness against the herbivore (Egan and Ott, 2007), the investigation  
315 establishing intra-specific heterozygosity for pest resistance is rare. Mopper *et al.* (1991) found  
316 heterozygous trees of *Pinus edulis* resistant to the herbivores and concluded that the higher  
317 heterozygosity might have contributed to resistance against the pest. Moreover, teak is known  
318 for its durable timber quality that is found resistant against termites as well (Tewari, 1999). Such  
319 intra-specific variation for the pest resistance might have resulted due to mutation or evolutionary  
320 recombination history of polygene responsible for the relative resistance of teak against the  
321 continuous seasonal infestation of teak skeletonizer. However, a species-specific investigation  
322 reported that the plant genetic diversity effects on predators were independent of herbivores  
323 (Koricheva and Hayes 2018), therefore, a thorough investigation can be conducted in the future  
324 to validate the positive effect of intra-specific heterozygosity on pest resistance in plants.

### 325 **Genomic loci associated with the relative resistance**

326 The enzyme CCoAMT catalyzes the methylation of caffeoyl-CoA in the phenylpropanoid  
327 pathway, which leads from trans-4-coumaroyl-CoA to trans-feruloyl-CoA (Matern and Kneusel  
328 1988; ZH *et al.* 2001). Under any pest or pathogen attacks, the extent of change in the cell wall  
329 determines the course of infection depending on the reaction of the above pathway for resistance  
330 to the pathogens (Liu *et al.* 2018). As a response, feruloyl-CoA plays a major role in esterification  
331 for cell wall polysaccharides and lignifications making the key enzyme CCoAMT hyper essential  
332 for resistance. In an early investigation of its kind, the CCoAMT related gene *ZmCCoAOMT2* is  
333 associated with resistance to multiple pathogens in *Zea mays* (Yang *et al.* 2017). Now in our  
334 investigation also, the locus CCoAMT-1 exhibited a significant association with the relative  
335 resistance against the pest teak skeletonizer. Since the function of the enzyme in the  
336 phenylpropanoid pathway for biosynthesis of monolignols has already been known, its  
337 association with resistance to teak skeletonizer strengthens the earlier findings regarding the  
338 role of lignin in plant resistance. We found the locus CCoAMT-1 contributed only a small fraction  
339 (6.6%) of resistance against the pest. On the replication of our finding of the association of  
340 enzyme involved in lignin biosynthesis with pest resistance, a number of QTLs can be developed  
341 related to the enzymes involved in the pathway, and those can indirectly be employed to screen  
342 out the elite teak genotypes with pest resistance. The quantitative inheritance of resistance trait  
343 fixes multiple loci with the relative and small effect of every locus during the polygenic  
344 inheritance. Therefore, the advanced molecular mapping techniques may help to localize and  
345 organize the other genes involved in pest resistance in teak.

### 346 **Conclusion**

347 Genetic improvement of teak in India recommends 'local source planting' for the restoration of  
348 natural teak populations in India. A significant positive correlation between intra-specific  
349 heterozygosity and relative resistance advocates selection of heterozygote superior or  
350 development of hybrid vigor clones of teak with resistance against skeletonizer to avoid the  
351 chances of pest infestation and for the restoration of its natural populations. It is rare to achieve  
352 complete resistance or immunity against pests, as it may differ depending on spatial and  
353 temporal variables. Therefore, most of the tree improvement programs aim to achieve relative  
354 resistance to reduce the damage by the pests to a tolerable level. Identification of genetic causal  
355 factors or genes related to the plant resistance has always been given importance over other  
356 measures adopted for pest control that may cause harm to the beneficial insects which help in  
357 pollination and gene flow among the host plants. Therefore, the MAS would be of great  
358 importance to single out the pest-resistant host plants for breeding, conservation, and plantation  
359 program. The locus CCoAMT-1 related to the *CCoAMT* enzyme can be employed for genomic  
360 selection of pest-resistant teak planting stocks, after validation of our finding in a test population.  
361 Nevertheless, considering the quantitative nature and continuous variation in the pest-resistance  
362 along with the small genome coverage of applied markers, further association mapping should  
363 be investigated employing a large number of markers to understand the expression level  
364 polymorphism linked with the resistance applying next-generation sequencing with quantifying  
365 the relative expression-based analysis.

## 366 **List of abbreviations**

367 12-oxo-phytodienoic acid reductase (OPR)  
368 Analysis of molecular variance (AMOVA)  
369 Caffeoyl-CoA O-methyltransferase (CCoAMT)  
370 Cinnamoyl-CoA reductase (CCR)  
371 Expected heterozygosity ( $H_e$ )  
372 Expressed sequence tag (EST)  
373 Integrated pest management (IPM)  
374 Linkage disequilibrium (LD)  
375 Lipoxygenase (LOX)  
376 Major allele frequency (MAF)  
377 Marker-assisted selection (MAS)  
378 National Teak Germplasm Bank (NTGB)  
379 Nuclear simple sequence repeats (nuSSRs)  
380 Observed heterozygosity ( $H_o$ )  
381 Phenylalanine ammonia-lyase (PAL)  
382 Polymorphic information content (PIC)  
383 Principle co-ordinate analysis (PCoA)  
384 Quantitative trait locus/loci (QTL/QTLs)  
385 Single nucleotide polymorphism (SNP)

## 386 **Competing interests**

387 The authors declare that they have no competing interests.

## 388 **Authors' contributions**

389 VV performed the field sampling and laboratory work, analyzed the data and prepared the first  
390 draft of the manuscript under the supervision of SAA and NK. SAA supported interpreting the  
391 molecular genetic part and NK supported in the entomology part of the investigation verifying the  
392 data and analysis. TSR drafted the final version of the manuscript through critical review for  
393 submission. All authors read and approved the final manuscript.

## 394 **Acknowledgements**

395 Institutional support from Director, Institute of forest productivity, Ranchi, India and Director,  
396 Tropical Forest Research Institute, Jabalpur, India is gratefully acknowledged. Authors are  
397 grateful also to Director, Maharashtra Van Sansodhan Sansthan, Chandrapur, to provide access  
398 to the National teak germplasm bank. Fellowship support from the Council of Scientific and  
399 Industrial Research (CSIR), India to 'VV' is acknowledged.

## 400 **References**

- 401 Basu-Chowdhury JC (1971) Interim report on the Konni aerial spraying project. In: Vasudevan  
402 KG (ed) Working Plan for Nilambur forest division, Govt. of Kerala, India
- 403 Beeson CFC (1941) The ecology and control of the forests insects of India and the neighboring  
404 countries. Vasant Press, New Delhi, India
- 405 Bradbury PJ, Zhang Z, Kroon DE, Casstevens TM, Ramdoss Y, Buckler ES (2007) TASSEL:  
406 software for association mapping of complex traits in diverse samples. *Bioinformatics* 23(19):  
407 2633–2635.
- 408 Broekgaarden C, Snoeren TAL, Dicke M, Vosman B (2011) Exploiting natural variation to  
409 identify insect-resistance genes. *Plant Biotechnol J* 9: 819–825.
- 410 Butcher P, Southerton S (2007) Marker-assisted selection in forestry species. In: Guimaraes  
411 EP, Ruane J, Scherf BD, Sonnino A, Dargie JD (ed) Marker-Assisted Selection, Current Status  
412 and Future Perspectives in Crops, Livestock, Forestry and Fish, Food and Agriculture  
413 Organization of the United Nations, Rome, pp 283-305
- 414 Carmona D, Lajeunesse MJ, Johnson MTJ (2011) Plant traits that predict resistance to  
415 herbivores. *Funct Ecol* 25: 358–367.
- 416 Cheua-ngam J, Volkaert H. (2006) Development of Catalase gene nuclear DNA-based marker  
417 for population genetic analysis in Thai teak (*Tectona grandis* L. f.). *Kasetsart J (Nat Sci)* 40:  
418 91–98.

- 419 Dixon RA *et al.* (2002) The phenylpropanoid pathway and plant defence – a genomics  
420 perspective. *Mol Plant Pathol* 3: 371–390.
- 421 Earl DA, vonHoldt BM (2012) STRUCTURE HARVESTER: a website and program for  
422 visualizing STRUCTURE output and implementing the Evanno method. *Conserv Genet Resour*  
423 4: 359–361.
- 424 Egan SP, Ott JR (2007) Host plant quality and local adaptation determine the distribution of a  
425 gall forming herbivore. *Ecol* 88: 2868– 2879.
- 426 Evanno G, Regnaut S, Goudet J (2005) Detecting the number of clusters of individuals using  
427 the software STRUCTURE: a simulation study. *Mol Ecol* 14: 2611–2620.
- 428 Excoffier L, Lischer HEL (2010) ARLEQUIN suite ver 3.5: a new series of programs to perform  
429 population genetics analyses under LINUX and WINDOWS. *Mol Ecol Note* 10: 564–567.
- 430 Falush D, Stephens M, Pritchard JK (2007) Inference of population structure using multilocus  
431 genotype data: dominant markers and null alleles. *Mol Ecol Note* 7: 574–578.
- 432 FAO (2003) Global forest resources assessment update 2005– FRA 2005 – Pilot study for  
433 country reporting: India. Forest Resources Assessment Working Paper 78. Available at:  
434 <http://www.fao.org/docrep/007/ae354e/AE354E00.htm>
- 435 Fofana IJ, Lidah YJ, Diarrassouba N, N'guetta SPA (2008) Genetic structure and conservation  
436 of teak (*Tectona grandis*) plantations in Cote d'Ivoire, revealed by site specific recombinase  
437 (SSR). *Trop Conserv Sci* 1(3): 279–292.
- 438 Foll M, Gaggiotti O (2008) A genome-scan method to identify selected loci appropriate for both  
439 dominant and codominant markers: a Bayesian perspective. *Genetic* 180(2): 977–993.
- 440 Fraser CM, Chapple C (2011) The phenylpropanoid pathway in Arabidopsis. *Arabidopsis Book*:  
441 e0152.
- 442 Grossi-de-Sá MF, Pelegri PB, Vasconcelos IM, Carlini CR, Silva MS (2015) Entomotoxic  
443 Plant Proteins: Potential molecules to develop genetically modified plants resistant to  
444 insectpests. In: Gopalakrishnakone P, Carlini CR, Ligabue-Braun R (ed) *Plant Toxins*,  
445 Dordrecht, Springer Netherlands, pp 1-34
- 446 Hedrick PW (2015) Heterozygote advantage: the effect of artificial selection in livestock and  
447 pets. *J Heredity* 106: 141–154.
- 448 Hubisz MJ, Falush D, Stephens M, Pritchard JK (2009) Inferring weak population structure with  
449 the assistance of sample group information. *Mol Ecol Resour* 9: 1322–1333.
- 450 Ingvarsson PK, Street NR (2011) Association genetics of complex traits in plants. *New Phytol*  
451 189(4): 909-922.
- 452 Kang HM, Zaitlen NA, Wade CM, Kirby A, Heckerman D (2008) Efficient control of population  
453 structure in model organism association mapping. *Genet* 178: 1709–1723.

- 454 Kaplan I, Dively GP, Denno RF (2009) The costs of anti-herbivore defense traits in agricultural  
455 crop plants: a case study involving leafhoppers and trichomes. *Ecol Appl* 19: 864–872.
- 456 Kawasaki T, Koita H, Nakatsubo T, Hasegawa K, Wakabayashi K, Takahashi H, Umemura K,  
457 Umezawa T, Shimamoto K (2006) Cinnamoyl-CoA reductase, a key enzyme in lignin  
458 biosynthesis, is an effector of small GTPase Rac in defense signaling in rice. *Proc Natl Acad  
459 Sci USA* 103: 230-235.
- 460 Kesari V, Sathyanarayana VM, Parida A, Rangam L (2010) Molecular marker-based  
461 characterization in candidate plus trees of *Pongamia pinnata*, a potential biodiesel legume.  
462 *AoB Plant plq017*. doi:10.1093/aobpla/plq017
- 463 Kim SY, Lohmueller KE, Albrechtsen A, Li Y, Korneliusen T (2011) Estimation of allele  
464 frequency and association mapping using next-generation sequencing data. *BMC  
465 Bioinformatics* 12: 231.
- 466 Kollert W, Walotek PJ (2015) Global teak trade in the aftermath of Myanmar's log export ban.  
467 *FAO Planted Forests and Trees Working Paper – 049*, Available at [http://www.fao.org/3/a-  
468 i5023e.pdf](http://www.fao.org/3/a-i5023e.pdf)
- 469 Koricheva J, Hayes D (2018) The relative importance of plant intraspecific diversity in  
470 structuring arthropod communities: a meta-analysis. *Funct Ecol* 32:1704–  
471 1717. <https://doi.org/10.1111/1365-2435.13062>
- 472 Kulkarni N (2017) Integrated pest management in tropical forestry. In: Rapisarda C, Cocuzza  
473 GEM (ed) *Integrated pest management in tropical regions*, CAB International, Oxfordshire, UK,  
474 pp 313-341
- 475 Kulkarni N, Joshi KC, Shukla PK (2004) Integrated insect pest management of forests insect  
476 pests. In: Gujar GT (ed) *Contemporary trends in insect science*, Campus books, New Delhi,  
477 India
- 478 Kumar V, Kotrange HR, Dhotekar UP (1998) Genetic improvement of teak. *Ind For* 124(9):  
479 687–695.
- 480 Kump KL, Bradbury PJ, Wisser RJ, Buckler ES, Belcher AR, Oropeza-Rosas MA, Zwonitzer  
481 JC, Kresovich S, McMullen MD, Ware D, Balint-Kurti PJ, Holland JB (2011) Genome-wide  
482 association study of quantitative resistance to southern late blight in the maize nested  
483 association mapping population. *Nature Genet* 43: 163–168.
- 484 Kusumawati L, Chumwong P, Jamboonsri W, Wanchana S, Siangliw JL, Siangliw M,  
485 Khanthong S, Vanavichit A, Kamolsukyeunyong W, Toojinda T (2018) Candidate genes and  
486 molecular markers associated with brown planthopper (*Nilaparvata lugens* Stål) resistance in  
487 rice cultivar Rathu Heenati. *Mol Breed* 38. <https://doi.org/10.1007/s11032-018-0847-5>
- 488 Liu K, Muse SV (2005) Integrated analysis environment for genetic marker data. *Bioinformatic  
489* 21(9): 2128–2129.
- 490 Liu Q, Luo L, Zheng L (2018) Lignins: Biosynthesis and biological functions in plants. *Int J Mol*

- 491 Sci 19: 335. <https://doi.org/10.3390/ijms19020335>
- 492 Mandel JR, Nambeesan S, Bowers JE, Marek LF, Ebert D, Rieseberg LH, Knapp SJ, Burke JM  
493 (2013) Association mapping and the genomic consequences of selection in sunflower. *PLoS*  
494 *Genet* 9(3): e1003378.
- 495 Matern U, Kneusel RE (1988) Phenolic compounds in plant disease resistance.  
496 *Phytoparasitica* 16: 213 – 226.
- 497 Moles AT *et al.* (2011) Putting plant resistance traits on the map: A test of the idea that plants  
498 are better defended at lower latitudes. *New Phytol* 191(3): 777–788.
- 499 Mopper S, Mitton JB, Whitham TG, Cobb NS, Christensen KM (1991) Genetic differentiation  
500 and heterozygosity in pinyon pine associated with resistance to herbivory and environmental  
501 stress. *Evol* 45: 989–999.
- 502 Motilal LA, Zhang D, Mischke S, Meinhardt LW, Boccara M, Fouet O, Lanaud C, Umaharan P  
503 (2016) Association mapping of seed and disease resistance traits in *Teobroma cacao* L. *Planta*  
504 244: 1265–1276.
- 505 Myles S, Peiffer J, Brown PJ, Ersoz ES, Zhang Z, Costich DE, & Buckler ES (2009).  
506 Association mapping: critical considerations shift from genotyping to experimental design. *Plant*  
507 *cell* 21(8): 2194–2202. <https://doi.org/10.1105/tpc.109.068437>
- 508 Nair KSS (2001) Pest outbreaks in tropical forest plantations: Is there a greater risk for exotic  
509 tree species? Center for International Forest Research, Bogor, Indonesia
- 510 Narayanan C, Dubey S, Wali SA, Shukla N, Kumar R, Mandal AK, Ansari AS (2006)  
511 Optimization of DNA extraction for ISSR studies in *Tectona grandis* L.f. - an important forest  
512 tree species. *Afr J Biotechnol* 5: 1220-1223.
- 513 Ning Y, Wang G (2018) Breeding plant broad-spectrum resistance without yield penalties. *Proc*  
514 *Nat Acad Sci USA*: 115(12). <https://doi.org/10.1073/pnas.1801235115>
- 515 Pritchard JK, Stephens JK, Rosenberg NA, Donnelly P (2000) Association mapping in  
516 structured populations. *Am J Hum Genet* 67: 170–181.
- 517 Quesada T, Gopal V, Cumbie WP *et al.* (2010) Association mapping of quantitative disease  
518 resistance in a natural population of Loblolly Pine (*Pinus taeda* L.). *Genet* 186: 677–686.
- 519 Raiskila S (2008) The effect of lignin content and lignin modification on Norway spruce wood  
520 properties and Decay resistance. Dissertation, Faculty of biosciences, Department of biology  
521 and environment sciences, University of Helsinki, Finland
- 522 Roychoudhury N, Joshi KC (1996) Search for natural resistance in teak clones against  
523 *Eutectona machaeralis* Walker (Lepidoptera: Pyralidae). *Ind J For* 19 (3): 205-213.
- 524 Sandhu S, Kang MS (2017) Advances in Breeding for Resistance to Insects. In: Arora R,  
525 Sandhu S (ed) *Breeding Insect Resistant Crops for Sustainable Agriculture*, Springer,

- 526 Singapore, pp 67–99. [https://doi.org/10.1007/978-981-10-6056-4\\_3](https://doi.org/10.1007/978-981-10-6056-4_3)
- 527 Sangeetha A, Arivudainamb S (2012) Studies on the efficacy of bio –products in the  
528 management of teak skeletonizer *Eutectona machaeralis* Walker (Pyralidae: Lepidoptera). *J*  
529 *Biopesticide* 5(2): 129-134.
- 530 Santiago R, Barros-Rios J, Malvar RA (2013) Impact of cell wall composition on maize  
531 resistance to pests and diseases. *Int J Mol Sci* 14: 6960–6980.
- 532 Schmitt D, Pakusch AE, Matern U (1991) Molecular cloning, induction, and taxonomic  
533 distribution of caffeoyl-CoA 3-Omethyltransferase, an enzyme involved in disease resistance.  
534 *J Biol Chem* 266: 17416-17423.
- 535 Shukla PK, Joshi KC (2001) Recent trends in insect pest control to enhance forest productivity.  
536 Tropical Forest Research Institute, Jabalpur, India
- 537 Sticher L, Mauch-Mani B, Meltraux JP (1997) Systemic acquired resistance. *Annu Rev*  
538 *Phytopathol* 35: 235–270.
- 539 Tan CT, Carver BF, Chen M, Gu Y, Yan L (2013) Genetic association of *OPR* genes with  
540 resistance to Hessian fly in hexaploid wheat. *BMC Genomics* 14: 369.
- 541 Tewari DN (1999) Monograph on teak. International Book Distributor, Dehradun, India
- 542 Thompson JN (2005) Coevolution: the geographic mosaic of coevolutionary arms races. *Curr*  
543 *Biol* 15: 992–994.
- 544 Vaishnav V, Ansari SA (2018) Genetic differentiation and adaptation in teak (*Tectona grandis*  
545 L.f.) metapopulations. *Plant Mol Biol Rep* : doi:10.1007/s11105-018-1101-3
- 546 Vaishnav V, Mohammad N, Wali SA, Kumar R, Tripathi SB, Negi MS, Ansari SA (2015) AFLP  
547 markers for analysis of genetic diversity and structure of teak (*Tectona grandis* L. f.) in India.  
548 *Can J For Res* 44: 297–306.
- 549 Verhaegen D, Fofana IJ, Logossa ZA, Ofori D (2010) What is the genetic origin of teak  
550 (*Tectona grandis* L. f. ) introduced in Africa and Indonesia? *Tree Genet Genome* 6: 717–733.
- 551 Yang Q, *et al.* (2017) A gene encoding maize caffeoyl-CoA O-methyltransferase confers  
552 quantitative resistance to multiple pathogens. *Nature Genet* 49: 1364–1372.
- 553 Yeh FC, Yang RC, Boyle TJ (1999) POPGENE, Version 1.3. Microsoft Windows-based  
554 freeware for population genetic analysis. Distributed by the author  
555 (<http://www.ualberta.ca/~fyeh/fyeh/>).
- 556 Yu J, Pressoir G, Briggs WH, Vroh Bil, Yamasaki M, Doebley JF, McMullen MD, Gaut BS,  
557 Nielsen DM, Holland JB, Kresovich S, Buckler ES (2006) A unified mixed-model method for  
558 association mapping that accounts for multiple levels of relatedness. *Nature Genet* 38(2): 203–  
559 208.



- 560 ZH Y, Zhong R, Morrison WH III, Himmelsbach DS (2001) Caffeoyl coenzyme A O-  
561 methyltransferase and lignin biosynthesis. *Phytochem* 57: 1177–1185.
- 562 Zhang J, Khan SA, Heckel DG, Bock R (2017) Next-generation insect-resistant plants: RNAi-  
563 mediated crop protection. *Trends Biotechnol* 35: 871–882.
- 564 Zhang M, Zhou C, Song Z, Weng Q, Li M, Ji H, Mo X, Huang H, Lu W, Luo J, Li F, Gan S  
565 (2018) The first identification of genomic loci in plants associated with resistance to galling  
566 insects: a case study in *Eucalyptus* L'Hér. (Myrtaceae). *Sci Rep* 8: 2319.
- 567 Zhang P, Zhong K, Tong H, Shahid MQ, Li J (2016) Association mapping for aluminum  
568 tolerance in a core collection of rice landraces. *Front Plant Sci* 7: doi:10.3389/fpls.2016.01415
- 569  
570

Tables

**Table 1** Genetic heterogeneity of the teak among nine classes of rating for resistance, covering relatively the most susceptible (3.0) to the most resistant (1.0) genotypes against teak skeletonizer

| Mean Rating | N  | %P     | Ho   |
|-------------|----|--------|------|
| 3.00        | 2  | 57.14  | 0.09 |
| 2.75        | 5  | 71.43  | 0.21 |
| 2.50        | 10 | 100.00 | 0.15 |
| 2.25        | 20 | 100.00 | 0.19 |
| 2.00        | 14 | 100.00 | 0.15 |
| 1.75        | 24 | 100.00 | 0.22 |
| 1.50        | 21 | 100.00 | 0.25 |
| 1.25        | 9  | 95.24  | 0.27 |
| 1.00        | 1  | 47.62  | 0.47 |

N- Number of genotypes, %P- percentage of polymorphism, Ho- observed heterozygosity

**Table 2** Information of microsatellites designed and adopted for cross-amplification on teak (*Tectona grandis* L.f.)

| Primers   | Codes  | Number | Information                                                                                   | Source/ reference                              |
|-----------|--------|--------|-----------------------------------------------------------------------------------------------|------------------------------------------------|
| EST-based | Ver    | 13     | Cross-amplified successfully on the teak genome and deposited in EMBL                         | EMBL accessions (Verhaegen <i>et al.</i> 2005) |
|           | PAL    | 3      | Found in <i>Eucalyptus pilularis</i> coding enzyme <i>PAL</i> and deposited in NCBI.          | NCBI accession AB591303.1                      |
|           | CCoAMT | 3      | Found in <i>Eucalyptus pilularis</i> coding enzyme <i>CCoAMT</i> and deposited in NCBI.       | NCBI accession AB591258.1                      |
|           | CCR    | 1      | Found in <i>Eucalyptus pilularis</i> coding enzyme <i>CCR</i> and deposited in NCBI.          | NCBI accession AB591262.1                      |
|           | Cat    | 1      | Found in plants coding <i>Catalase</i> enzyme and cross-amplified successfully on teak genome | Cheua-ngam and Volkaert (2006)                 |

## Figures

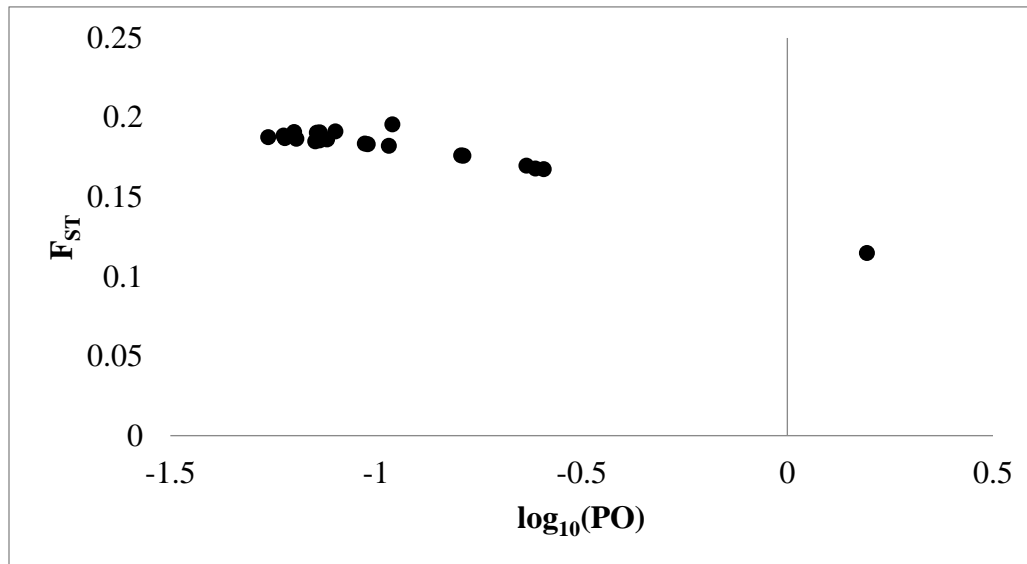

**Figure 1** Bayescan analysis resulting  $F_{ST}$  values on Bayes Factor, i.e.  $\log_{10}(\text{PO})$  for 21 markers, confirms no outlier ( $\log_{10}(\text{PO}) > 0.5$ ) depicting no evidence of selection.

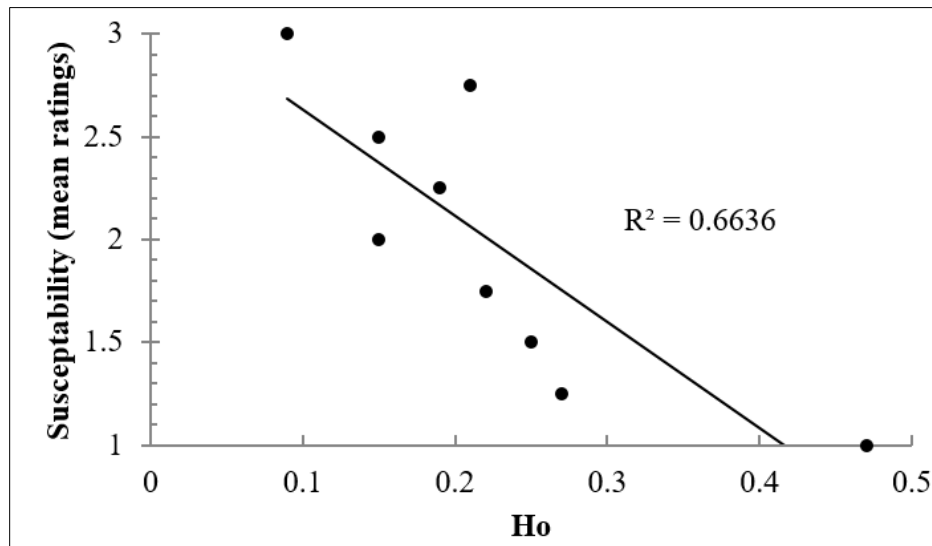

**Figure 2** Observed heterozygosity ( $H_o$ ) of teak genotypes in different relative resistance classes was observed declining from high resistant (1.0) to high susceptible (3.0) classes of teak against teak skeletonizer

Additional file

Additional Table and Figures
